# Supplementary material for: Hydroxycarboxylic acid receptors are essential for breast cancer cells to control their lipid/fatty acid metabolism
Source: PubMed Central journal article supplement (PMC4637315; doi:10.18632/oncotarget.3565), 2015-03-14
Supplement: oncotarget-06-19706-s001.pdf [file oncotarget-06-19706-s001.pdf]

## Hydroxycarboxylic acid receptors are essential for breast cancer cells to control their lipid/fatty acid metabolism

### Supplementary Material

#### Supplemental Tables

**Table S1:** Origin and pathology verification of normal tissue samples that are part of the Cancer and Normal TissueScan™ Cancer Survey cDNA qPCR Array – I (CSRT501) as given in the datasheet provided by Origene

| Tissue of (Origin/Finding)            | Appearance | Pathology verification notes from H&E review                                                                   |
|---------------------------------------|------------|----------------------------------------------------------------------------------------------------------------|
| Breast / Breast                       | Normal     | 10% Glandular epithelium, 25% Stroma, 65% Adipose tissue                                                       |
| Breast / Breast                       | Normal     | 35% glandular epithelium, 65% stroma                                                                           |
| Breast / Breast                       | Normal     | Non Tumor Structures: 20% Glandular epithelium, 20% Stroma, 60% Adipose tissue                                 |
| Colon: right / Colon: right           | Normal     | Non Tumor Structures: 5% Mucosa, 50% Submucosa, 45% Muscle                                                     |
| Colon: sigmoid / Colon: sigmoid       | Normal     | 20% Mucosa, 80% Submucosa and Muscle                                                                           |
| Colon: transverse / Colon: transverse | Normal     | Non Tumor Structures: 20% Mucosa, 20% Submucosa, 60% Muscle                                                    |
| Kidney / Kidney                       | Normal     | 100% cortex                                                                                                    |
| Kidney / Kidney                       | Normal     | 90% cortex, 10% medulla, 0% pelvis                                                                             |
| Kidney / Kidney                       | Normal     | 100% cortex                                                                                                    |
| Liver / Liver                         | Normal     | 98% lobules, 2% bile ducts                                                                                     |
| Liver / Liver                         | Normal     | 98% Hepatocytes, 2% Portal triads                                                                              |
| Liver / Liver                         | Normal     | 97% lobules, 3% triads                                                                                         |
| Lung / Lung                           | Normal     | 90% alveoli, 5% bronchioles, 5% fibrovascular septa                                                            |
| Lung / Lung                           | Normal     | 80% alveoli, 5% bronchioles, 15% fibrovascular septae; prominent lymphoid aggregates present in fibrous septae |
| Lung / Lung                           | Normal     | 90% alveoli, 10% fibrovascular septae and pleura                                                               |
| Ovary / Ovary                         | Normal     | 75% ovarian stroma, 25% hilar vessels                                                                          |
| Ovary: right / Ovary: right           | Normal     | 65% ovarian stroma, 5% hilar vessels, 30% corpus luteum                                                        |

|                               |        |                                                                   |
|-------------------------------|--------|-------------------------------------------------------------------|
| Ovary / Ovary                 | Normal | 95% ovarian stroma, 5% hilar vessels; contains large corpus lutea |
| Prostate / Prostate           | Normal | 30% glandular epithelium, 70% fibromuscular stroma                |
| Prostate / Prostate           | Normal | 20% epithelium, 80% fibromuscular stroma                          |
| Prostate / Prostate           | Normal | 25% epithelium, 70% fibromuscular stroma                          |
| Thyroid gland / Thyroid gland | Normal | 80% thyroid follicles, 20% fibrovascular stroma/septae            |
| Thyroid gland / Thyroid gland | Normal | Non Tumor Structures: 80% Thyroid follicles, 20% Fibrous stroma   |
| Thyroid gland / Thyroid gland | Normal | 85% thyroid follicles, 15% fibrous stroma                         |

**Table S2: siRNA sequences as stated by OriGene**

| <b>OriGene<br/>Catalog No</b> | <b>gene</b>            | <b>sequence</b>                                  |
|-------------------------------|------------------------|--------------------------------------------------|
| SR309029A                     | human HCA <sub>1</sub> | rGrGrArCrUrCrUrArCrGrArArArUrGrArCrArArGrCrUrGCC |
| SR309029B                     | human HCA <sub>1</sub> | rGrCrArUrCrArGrUrGrUrGrGrCrArArArUrArGrUrUrUrCCA |
| SR309029C                     | human HCA <sub>1</sub> | rArGrUrGrGrUrGrArCrUrUrArGrArArUrUrArArCrUrCrGTG |
| SR317390A                     | human HCA <sub>2</sub> | rArCrArArCrUrArUrGrUrGrArGrGrCrGrUrUrGrGrGrArCTG |
| SR317390B                     | human HCA <sub>2</sub> | rGrCrGrArUrUrArGrGrGrArArArCrGrGrUrGrGrCrArGAT   |
| SR317390C                     | human HCA <sub>2</sub> | rGrGrCrCrCrArArCrCrUrCrUrCrCrUrUrArArArUrArArCCA |
| SR305839A                     | human HCA <sub>3</sub> | rGrGrCrArGrGrCrArCrGrGrArArCrCrArCrArCrGrUrUrCAC |
| SR305839B                     | human HCA <sub>3</sub> | rCrArArCrCrUrCrArArArUrArArCrCrArUrUrCrCrArArGAA |
| SR305839C                     | human HCA <sub>3</sub> | rGrCrCrGrUrUrCrGrUrGrArUrGrGrArCrUrArCrUrArUrGTG |

**Table S3: Targeted list of compounds that were detected in medium of siRNA transfected BT-474 using LC-MS.**

|                      |             |                               | metabolite concentration in medium as %<br>of siNC transfected BT-474 |                         |                         |      |            |                                         |
|----------------------|-------------|-------------------------------|-----------------------------------------------------------------------|-------------------------|-------------------------|------|------------|-----------------------------------------|
| <b>positive mode</b> |             |                               |                                                                       |                         |                         |      |            |                                         |
| monoisotopic mass    | sum formula | name                          | siHCA <sub>3</sub> (15)                                               | siHCA <sub>3</sub> (30) | siHCA <sub>3</sub> (60) | siNC | medium     | p-value siHCA <sub>3</sub> (15) vs siNC |
| 231.1471             | C11H21NO4   | Isobutyryl-L-carnitine        | 97.7±1.7                                                              | 97.7±1.6                | 96.0±2.0                | 100  | 93.6±0.4   | ns                                      |
| 231.1471             | C11H21NO4   | Butyrylcarnitine              | 100.7±1.8                                                             | 96.2±1.4                | 77.3±6.7                | 100  | 36.1±0.7   | ns                                      |
| 243.1471             | C12H21NO4   | Tiglylcarnitine               | 89.7±4.0                                                              | 82.6±0.1                | 78.3±0.6                | 100  | 57.7±1.5   | 0.0178                                  |
| 259.1784             | C13H25NO4   | Hexanoylcarnitine             | 103.7±3.3                                                             | 106.3±4.0               | 98.6±10.5               | 100  | 55.5±3.2   | ns                                      |
| 273.1940             | C14H27NO4   | Heptanoylcarnitine            | 95.3±4.7                                                              | 98.0±5.1                | 100.0±5.5               | 100  | 107.4±4.7  | ns                                      |
| 287.2097             | C15H29NO4   | Octanoylcarnitine             | 83.3±18.0                                                             | 81.3±13.8               | 64.9±17.6               | 100  | 39.2±17.1  | ns                                      |
| 315.2410             | C17H33NO4   | Decanoylcarnitine             | 122.9±1.6                                                             | 126.2±8.4               | 98.2±18.8               | 100  | 17.1±1.1   | 0.0046                                  |
| 343.2723             | C19H37NO4   | Dodecanoylcarnitine           | 120.7±2.5                                                             | 135.2±3.1               | 127.3±7.8               | 100  | 55.1±11.3  | 0.0143                                  |
| 371.3036             | C21H41NO4   | Tetradecanoylcarnitine        | 112.9±2.9                                                             | 125.5±6.1               | 122.0±8.9               | 100  | 60.7±2.9   | 0.0470                                  |
| 399.3349             | C23H45NO4   | Hexadecanoylcarnitine         | 109.5±5.2                                                             | 133.1±2.8               | 116.5±3.4               | 100  | 56.6±9.9   | ns                                      |
| 425.3505             | C25H47NO4   | Oleoylcarnitine               | 124.2±7.0                                                             | 155.8±1.7               | 154.1±0.4               | 100  | 101.6±10.5 | 0.0738                                  |
| 427.3662             | C25H49NO4   | Octadecanoylcarnitine         | 94.6±3.1                                                              | 108.9±5.5               | 103.5±7.4               | 100  | 93.4±0.2   | ns                                      |
| <b>negative mode</b> |             |                               |                                                                       |                         |                         |      |            |                                         |
| 74.0004              | C2H2O3      | Glyoxylic acid                | 118.5±11.3                                                            | 127.8±3.1               | 142.6±18.1              | 100  | 106.2±14.6 | ns                                      |
| 116.0837             | C6H12O2     | Caproic acid                  | 94.7±0.6                                                              | 97.6±2.2                | 106.6±4.3               | 100  | 101.8±0.1  | 0.0116                                  |
| 118.0266             | C4H6O4      | Succinic acid                 | 100.9±1.9                                                             | 97.4±0.3                | 90.0±2.8                | 100  | 99.5±10.5  | ns                                      |
| 118.0630             | C5H10O3     | 3-Hydroxyvaleric acid         | 98.1±3.0                                                              | 98.2±3.4                | 90.3±0.5                | 100  | 88.3±0.9   | ns                                      |
| 132.0786             | C6H12O3     | 3-Hydroxyhexanoic acid        | 92.7±1.9                                                              | 88.2±1.9                | 75.6±1.1                | 100  | 43.5±0.1   | 0.0625                                  |
| 134.0216             | C4H6O5      | Malic acid                    | 116.4±12.4                                                            | 126.3±4.1               | 139.8±19.2              | 100  | 117.5±4.6  | ns                                      |
| 146.0215             | C5H6O5      | α-Ketoglutaric acid           | 105.2±5.7                                                             | 109.3±5.0               | 103.6±7.8               | 100  | 101.4±1.9  | ns                                      |
| 160.0735             | C7H12O4     | Pimelic acid                  | 98.2±1.8                                                              | 98.4±2.6                | 105.7±1.6               | 100  | 98.6±0.1   | ns                                      |
| 160.1099             | C8H16O3     | 3-Hydroxyoctanoic acid        | 110.4±8.3                                                             | 104.5±0.8               | 84.5±3.5                | 100  | NA         | ns                                      |
| 165.0790             | C9H11NO2    | DL-phenylalanine              | 98.8±0.5                                                              | 101.4±1.4               | 104.8±1.2               | 100  | 107.3±10.1 | ns                                      |
| 166.0630             | C9H10O3     | 3-(3-Hydroxyphenyl)propanoate | 88.7±1.2                                                              | 83.1±0.6                | 74.1±2.8                | 100  | 49.7±3.9   | 0.0110                                  |

|          |            |                                |            |            |            |     |            |        |
|----------|------------|--------------------------------|------------|------------|------------|-----|------------|--------|
| 174.1117 | C6H14N4O2  | Arginine                       | 101.3±2.5  | 99.4±3.4   | 100.9±2.4  | 100 | 105.8±7.0  | ns     |
| 179.0582 | C9H9NO3    | Hippurate                      | 96.4±2.2   | 98.3±0.8   | 100.3±1.3  | 100 | 97.1±0.4   | ns     |
| 182.0579 | C9H10O4    | Hydroxyphenyllactic acid       | 90.9±1.4   | 89.9±5.2   | 75.7±0.4   | 100 | 60.8±0.6   | 0.0217 |
| 183.0532 | C8H9NO4    | Pyridoxate                     | 98.4±0.5   | 99.4±1.1   | 97.9±3.6   | 100 | 95.3±2.1   | 0.0677 |
| 188.1049 | C9H16O4    | Azelaic acid                   | 91.8±5.6   | 83.3±3.5   | 93.7±6.1   | 100 | 77.0±9.7   | ns     |
| 188.1412 | C10H20O3   | 3-Hydroxydecanoic acid         | 105.5±11.5 | 112.5±2.5  | 96.1±7.3   | 100 | NA         | ns     |
| 192.0270 | C6H8O7     | Citric acid                    | 105.0±5.9  | 109.6±5.5  | 103.9±7.3  | 100 | 102.4±1.3  | ns     |
| 202.1205 | C10H18O4   | Sebacic acid                   | 87.0±10.8  | 96.7±3.5   | 84.8±8.0   | 100 | 77.2±12.3  | ns     |
| 214.1569 | C12H22O3   | 3-Oxododecanoic acid           | 107.0±6.2  | 101.5±3.5  | 88.7±5.7   | 100 | NA         | ns     |
| 216.1362 | C11H20O4   | Undecanedioic acid             | 70.2±17.3  | 78.5±12.8  | 51.3±1.7   | 100 | 28.1±12.2  | ns     |
| 216.1725 | C12H24O3   | 3-Hydroxydodecanoic acid       | 115.3±2.7  | 116.4±2.3  | 119.8±0.1  | 100 | NA         | 0.0298 |
| 216.1725 | C12H24O3   | 12-Hydroxydodecanoic acid      | 68.2±6.0   | 67.1±7.6   | 62.0±1.3   | 100 | NA         | 0.0334 |
| 219.1170 | C9H17NO5   | D-pantothenate                 | 96.8±2.3   | 99.4±0.5   | 99.0±2.4   | 100 | 98.7±1.0   | ns     |
| 230.1518 | C12H22O4   | Dodecanedioic acid             | 48.9±7.8   | 59.2±9.5   | 35.0±3.6   | 100 | 12.8±6.7   | 0.0222 |
| 242.1882 | C14H26O3   | 3-Oxotetradecanoic acid        | 122.6±1.4  | 127.7±4.7  | 122.4±0.5  | 100 | NA         | 0.0036 |
| 244.1675 | C13H24O4   | 1,11-Undecanedicarboxylic acid | 54.3±14.3  | 67.9±2.9   | 45.6±11.3  | 100 | 12.4±9.2   | 0.0851 |
| 256.2402 | C16H32O2   | Palmitic acid (16:0)           | 86.6±5.9   | 96.7±9.7   | 108.9±12.2 | 100 | 109.7±17.3 | ns     |
| 258.1831 | C14H26O4   | Tetradecanedioic acid          | 70.3±6.6   | 69.5±5.4   | 56.8±3.7   | 100 | 41.1±2.7   | 0.0465 |
| 272.2351 | C16H32O3   | 3-Hydroxy-hexadecanoic acid    | 97.9±10.3  | 127.2±3.2  | 171.0±18.8 | 100 | 263.5±12.6 | ns     |
| 282.2559 | C18H34O2   | Oleic acid (18:1(n-9))         | 103.8±9.0  | 121.7±12.9 | 153.0±6.6  | 100 | 123.8±3.3  | ns     |
| 284.2715 | C18H36O2   | Stearic acid (18:0)            | 89.9±16.9  | 97.0±22.7  | 110.1±21.8 | 100 | 116.6±28.6 | ns     |
| 300.2659 | C18H36O3   | 3-Hydroxy-octadecanoic acid    | 69.2±4.9   | 57.4±3.9   | 38.2±1.1   | 100 | NA         | 0.0243 |
| 304.2402 | C20H32O2   | Arachidonic acid (20:4(n-6))   | 118.5±0.6  | 152.2±21.6 | 219.7±1.2  | 100 | 220.7±21.8 | 0.0011 |
| 328.2402 | C22H32O2   | Docosahexaenoate 22:6(n-3)     | 104.1±1.5  | 119.5±0.9  | 146.7±7.2  | 100 | 121.3±22.1 | ns     |
| 376.1383 | C17H20N4O6 | Riboflavin (Vitamin B2)        | 105.0±0.6  | 103.5±3.6  | 103.3±6.4  | 100 | 113.2±5.1  | 0.0121 |
| 441.1397 | C19H19N7O6 | Folic acid                     | 98.1±2.0   | 99.5±1.3   | 98.5±1.3   | 100 | 97.8±1.0   | ns     |
| 449.3141 | C26H43NO5  | Glycochenodeoxycholate         | 92.1±7.3   | 94.9±2.9   | 90.6±8.9   | 100 | 91.9±7.0   | ns     |
| 449.3141 | C26H43NO5  | Glycodeoxycholate              | 97.0±3.3   | 94.4±1.3   | 90.7±8.5   | 100 | 93.7±9.0   | ns     |
| 465.3090 | C26H43NO6  | Glycocholic acid               | 93.7±4.4   | 94.2±4.5   | 92.1±10.9  | 100 | 87.9±3.2   | ns     |
| 495.3325 | C24H50NO7P | LysoPC(16:0)                   | 84.3±0.6   | 84.8±0.3   | 92.6±3.2   | 100 | 144.5±15.3 | 0.0012 |

|          |            |                        |           |          |          |     |            |        |
|----------|------------|------------------------|-----------|----------|----------|-----|------------|--------|
| 499.2968 | C26H45NO6S | Taurochenodeoxycholate | 97.0±1.5  | 96.9±0.3 | 90.5±9.3 | 100 | 95.8±8.9   | ns     |
| 499.2968 | C26H45NO6S | Taurodeoxycholate      | 90.1±4.1  | 88.8±3.2 | 90.9±6.9 | 100 | 92.6±12.5  | ns     |
| 515.2917 | C26H45NO7S | Taurocholate           | 100.0±0.6 | 96.6±2.0 | 93.3±6.8 | 100 | 96.6±8.6   | ns     |
| 521.3481 | C26H52NO7P | LysoPC(18:1)           | 82.0±0.9  | 82.4±3.9 | 92.4±9.1 | 100 | 259.2±38.7 | 0.0025 |
| 523.3638 | C26H54NO7P | LysoPC(18:0)           | 76.7±6.7  | 78.3±3.9 | 85.9±6.5 | 100 | 150.8±12.6 | 0.0350 |

NA: not detectable in medium alone; ns: not significant  $p \geq 0.1$ ; p-value determined using two-tailed unpaired t-test

**Table S4: HCA<sub>1</sub>, HCA<sub>2</sub> and HCA<sub>3</sub> cloning primers**

| <b>Name</b>                              | <b>Sequence (5'-3')</b> |
|------------------------------------------|-------------------------|
| GGTGAGTGCTAACGCTCAGAT                    | HCAR1-ORF-S             |
| CCGACAGAATGAGAAGGATGC                    | HCAR1-ORF-AS            |
| CCCCGACTACGCCTACAACGGRTCGTGCTG           | HCAR1-S-HA-adaptor      |
| CGTCATCGTCCTTATAGTCGTGCCACTCAACAATGT     | HCAR1-AS-FLAG-adaptor   |
| CAACACCCTGACATGACATAAAG                  | HCAR2/3-ORF-S           |
| TCCCTGAGTCCATTTCTGCTAA                   | HCAR2/3-ORF-AS          |
| CCCCGACTACGCCAATCGGCACCATCTGCAG          | HCAR2/3-S-HA-adaptor    |
| CGTCATCGTCCTTATAGTCAGGAGAGGTTGGGCC       | HCAR2-AS-FLAG-adaptor   |
| CGTCATCGTCCTTATAGTCCTCGATGCAACAGCC       | HCAR3-AS-FLAG-adaptor   |
| CGCGAATTCCCCACCATGTACCCCTACGACGTCCC      | HA-S-universal          |
| CGCCGCACTAGTTCACCTTATCGTCATCGTCCTTATAGTC | FLAG-AS-universal       |

**Table S5: qPCR primer sequences**

| No. | Name                 | Sequence (5'-3')         | primer efficiency mean±SEM n=3 | GenBank accession number (NCBI) |
|-----|----------------------|--------------------------|--------------------------------|---------------------------------|
| 1   | HCAR1-387-forward    | GCCCAGCACTGTTTACCTTTTC   | 1.03±0.02                      | NM_032554.3                     |
| 2   | HCAR1-496-reverse    | CCCCAAAAGCCAGTGTCTAC     |                                |                                 |
| 3   | HCAR2-266-forward    | TTTCCTGTTCAACCTGGCAGT    | 0.99±0.02                      | NM_177551.3                     |
| 4   | HCAR2-352-reverse    | CAGTCCCAACGCCTCACAT      |                                |                                 |
| 5   | HCAR3-1231-forward   | GCCCAACCTCAAATAACCATTCC  | 0.96±0.01                      | NM_006018.2                     |
| 6   | HCAR3-1316-reverse   | CTCGATGCAACAGCCCAACT     |                                |                                 |
| 7   | HCAR3-86-forward     | TACAGACACACGCCACTTTG     | n.d.                           | NM_006018.2                     |
| 8   | HCAR3-246-reverse    | GCAACACCTTGCAATGAAG      |                                |                                 |
| 9   | HCAR3-460-forward    | TGGTGCTCTTCATGTTTGCC     | n.d.                           | NM_006018.2                     |
| 10  | HCAR3-626-reverse    | GCCAACAGTGATGCCCA        |                                |                                 |
| 11  | RPS18-106-forward    | GATGGGCGGCGGAAAATAG      | 0.96±0.02                      | NM_022551.2                     |
| 12  | RPS18-192-reverse    | GTCTGCTTTCTCAACACCAC     |                                |                                 |
| 13  | ACTB-1412-forward    | ACAATGTGGCCGAGGACTTT     | 0.95±0.02                      | NM_001101.3                     |
| 14  | ACTB-1519-reverse    | TGGGGTGGCTTTTAGGATGG     |                                |                                 |
| 15  | RPL13A-179-forward   | GTCGTACGCTGTGAAGGCAT     | 0.97±0.03                      | NM_012423.3                     |
| 16  | RPL13A-279-reverse   | CGGGAAGGGTTGGTGTTTCAT    |                                |                                 |
| 17  | GAPDH-121-forward    | CAGTCAGCCGCATCTTCTTTTG   | n.d.                           | NM_002046.4                     |
| 18  | GAPDH-206-reverse    | AATCCGTTGACTCCGACCTTC    |                                |                                 |
| 19  | RPLO-802-forward     | GAAACTCTGCATTCTCGCTTCC   | n.d.                           | NM_001002.3                     |
| 20  | RPLO-926-reverse     | GCCAGGACTCGTTTGTACCC     |                                |                                 |
| 21  | HSC70-166-forward    | AAACCGAACCCTCCAAGCT      | n.d.                           | AF352832.1                      |
| 22  | HSC70-265-reverse    | AACTGTGTTGGTGGGGTTCA     |                                |                                 |
| 24  | H2ai-425-forward     | GCTGCAAATAATCCAGGCTT     | n.d.                           | NM_003509.2                     |
| 25  | H2ai-440-reverse     | CTTTGGGATTGAGTTGCTGCA    |                                |                                 |
| 26  | ACTB-OriGene forward | CAGCCATGTACGTTGCTATCCAGG | n.d.                           | NM_001101                       |
| 27  | ACTB-OriGene reverse | AGGTCCAGACGCAGGATGGCATG  |                                |                                 |

**Table S6: SABiosciences qPCR primers**

| SABiosciences Catalog No | Gene symbol | RefSeq Accession | Band size | Reference position |
|--------------------------|-------------|------------------|-----------|--------------------|
| 330001 PPH01865A         | HCAR1       | NM_032554.3      | 122       | 475                |
| 330001 PPH58193B         | HCAR2       | NM_177551.3      | 182       | 395                |
| 330001 PPH01346E         | HCAR3       | NM_006018.2      | 161       | 1370               |



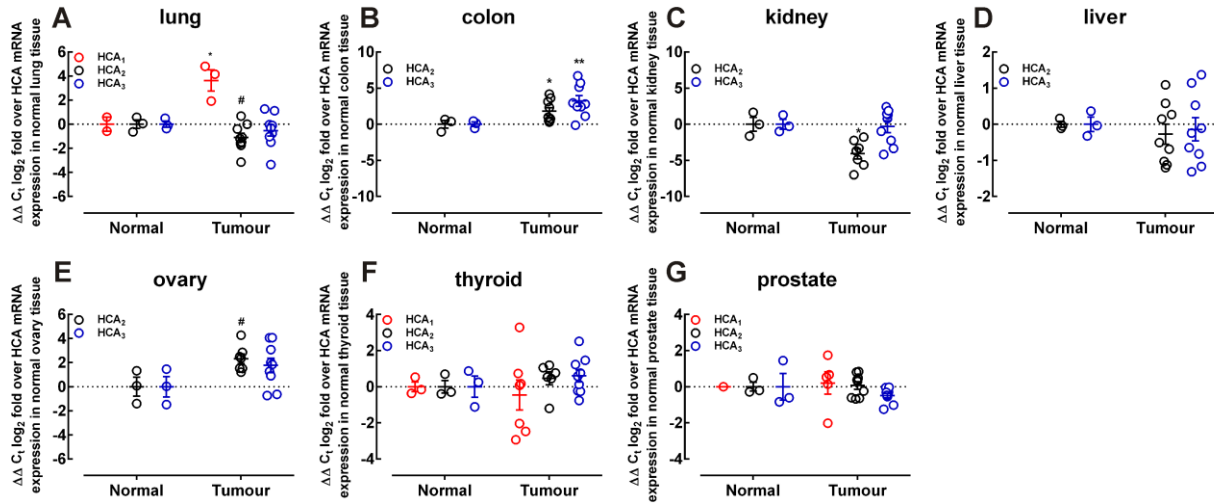

**Figure S1: HCA mRNA expression in 7 different cancer tissues versus normal tissues.** mRNA expression of HCA<sub>1</sub>, HCA<sub>2</sub> and HCA<sub>3</sub> in (A) lung (B) colon, (C) kidney, (D) liver, (E) ovary, (F) thyroid and (G) prostate cancer versus normal patient tissue (two-tailed unpaired t-test, Welch's correction) No HCA<sub>1</sub> mRNA expression was detectable in colon, kidney, liver and ovary normal tissue, but in 3 samples of colon cancer and 4 samples of ovarian cancer patient tissue (data not shown). Significance was assessed using a two-tailed unpaired t-test followed by Welch's correction. #  $P \leq 0.1$  \*  $P \leq 0.05$ ; \*\*  $P \leq 0.01$ ; \*\*\*  $P \leq 0.001$ . All data is shown as mean  $\pm$  SEM. One point reflects one patient tissue sample. Values were determined in technical duplicates.

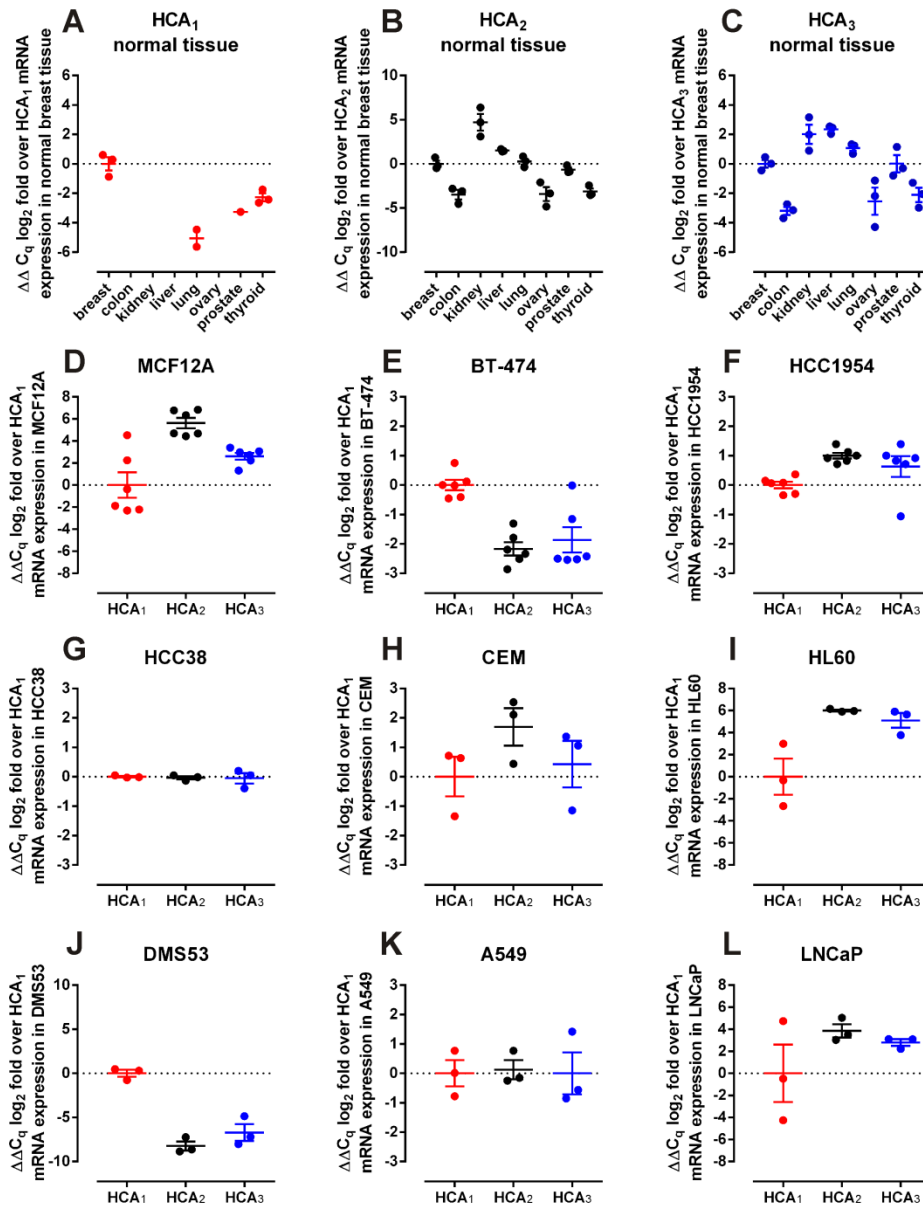

**Figure S2: HCA mRNA expression in normal tissue and relative to HCA<sub>1</sub> mRNA expression in 9 cell lines.** mRNA expression of (A) HCA<sub>1</sub>, (B) HCA<sub>2</sub> and (C) HCA<sub>3</sub> in normal patient tissue samples. (A-C) Respective HCA mRNA expression in breast was set 1. (D-L) Presented is HCA<sub>2</sub> and HCA<sub>3</sub> mRNA expression relative to HCA<sub>1</sub> (set 1) in 9 different cell lines. All data is shown as mean  $\pm$  SEM. Each point reflects a biological replicate.

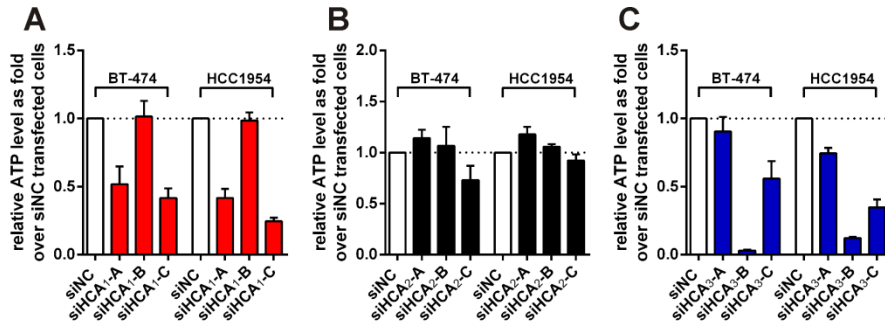

**Figure S3: Effect of single siRNAs directed against HCA<sub>1</sub>, HCA<sub>2</sub> and HCA<sub>3</sub> on BT-474 and HCC1954 cells.** Cell viability of siHCA<sub>1</sub>-A, siHCA<sub>1</sub>-B and siHCA<sub>1</sub>-C (A), siHCA<sub>2</sub>-A, siHCA<sub>2</sub>-B and siHCA<sub>2</sub>-C (B) and siHCA<sub>3</sub>-A, siHCA<sub>3</sub>-B and siHCA<sub>3</sub>-C (C) versus siNC transfected BT-474 and HCC1954 cells was determined 72h after transfection using the ATPlite assay (Perkin Elmer). All data is shown as mean ± SEM of 3 independent experiments carried out in triplicates.

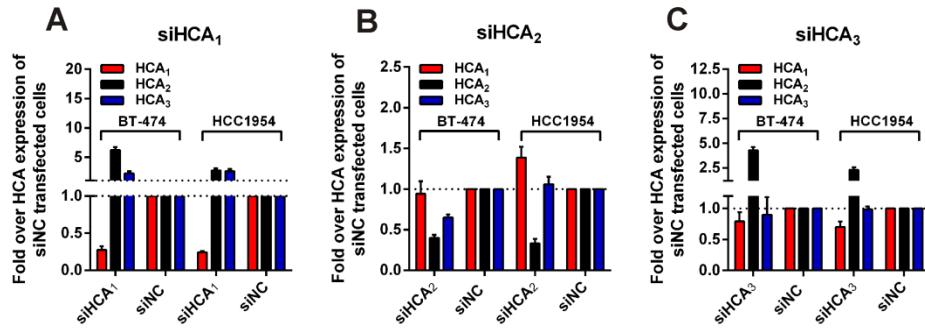

**Figure S4: HCA mRNA expression levels in BT-474 and HCC1954 48h after siRNA transfection.** (A) 70-80% knock-down of HCA<sub>1</sub> was detectable in both cell lines, whereas HCA<sub>2</sub> and HCA<sub>3</sub> mRNA level was up-regulated. (B) siHCA<sub>2</sub> induced 60-70% knock-down of HCA<sub>2</sub>. In BT-474 HCA<sub>3</sub> mRNA expression level was about 30% reduced. (C) HCA<sub>3</sub> knock-down was not consistently detectable due to changes in reference genes caused by induced apoptosis. Data (mean ± SEM, n = 6) is shown as fold over expression in siNC-transfected cells.

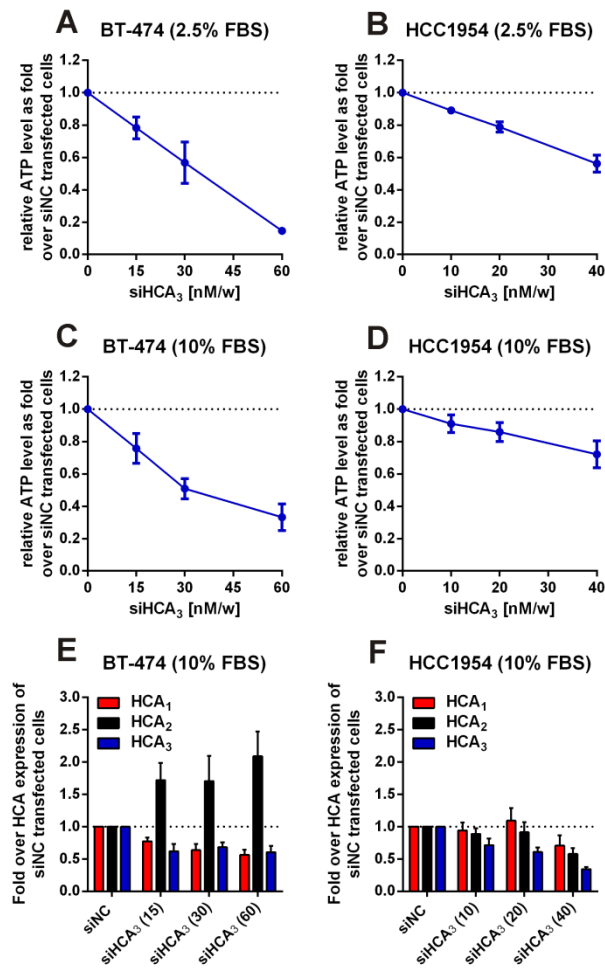

**Figure S5: Cell viability and HCA mRNA expression levels in BT-474 and HCC1954 transfected with decreasing concentrations of siHCA<sub>3</sub>.** Cell viability was determined 48h after siRNA transfection carried out in (A, B) RPMI1640 supplemented with 2.5% FBS (n = 2) or (C, D) 10% FBS (n = 3). X-axis shows the amount of HCA<sub>3</sub>-specific siRNA per well. 50% knock-down of HCA<sub>3</sub> was detectable in BT-474 with 60 nM siHCA<sub>3</sub> per well (n = 3). (F) In HCC1954 a final concentration of 40 nM siHCA<sub>3</sub> per well induced 70-80% knock-down of HCA<sub>3</sub> (n = 3). All data is shown as mean ± SEM.

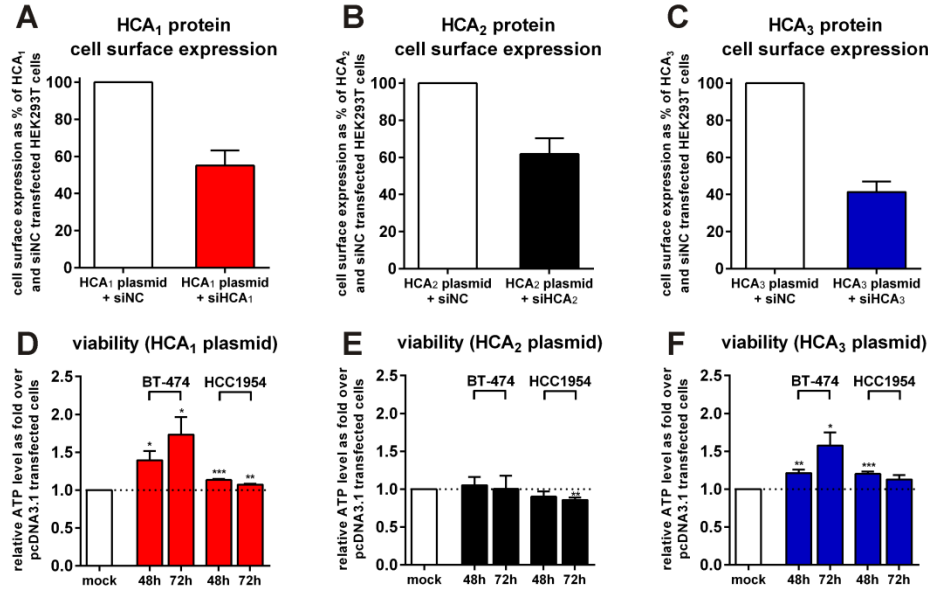

**Figure S6: Effect of siRNA-induced knock-down on HCA cell surface expression of transiently with HCA plasmid transfected HEK293T cells and impact of HCA overexpression on BT-474 and HCC1954 viability.** Cell surface expression levels of transiently with HA-tagged HCA<sub>1</sub> (A), HCA<sub>2</sub> (B) or HCA<sub>3</sub> (C) in pcDNA3.1 and respective HCA-specific siRNA or siNC co-transfected HEK293T cells were measured by a cell surface ELISA. Specific optical density (OD) readings are given as a percentage of HEK293T cells co-transfected with respective HA-tagged HCA encoding plasmid and siNC. The non-specific OD value (empty vector) was  $0.001 \pm 0.0003$ . The OD value of the HA-tagged HCA<sub>1</sub> was  $0.010 \pm 0.002$  (A), of the HA-tagged HCA<sub>2</sub> was  $0.431 \pm 0.044$  (B) and HA-tagged HCA<sub>3</sub> was  $0.197 \pm 0.034$  (C). Data is presented as mean  $\pm$  SEM of 3 independent experiments carried out in triplicates. Cell viability of transiently with HCA<sub>1</sub> in pcDNA3.1 (D), HCA<sub>2</sub> in pcDNA3.1 (E) or HCA<sub>3</sub> in pcDNA3.1 (F) transfected BT-474 and HCC1954 cells was determined 48h or 72h after transfection using the ATPlite assay (Perkin Elmer). (D-F) Data is shown as mean  $\pm$  SEM of 4 independent experiments carried out in triplicates. P values were determined using a two-tailed unpaired t-test. \*  $P \leq 0.05$ ; \*\*  $P \leq 0.01$ ; \*\*\*  $P \leq 0.001$ .
